# Supplementary material for: Covalent polyoxometalate–polyimide hybridization: multi-scale molecular engineering toward high-performance sodium-ion battery anodes
Source: Royal Society of Chemistry journal article supplement (doi:10.1039/d6sc03972c), 2026-06-15
Supplement: d6sc03972c1.pdf [file d6sc03972c1.pdf]

*Supplementary Information for*

**Covalent Polyoxometalate-Polyimide Hybridization: Multi-Scale  
Molecular Engineering toward High-Performance Sodium-Ion  
Battery Anodes**

Zhengyu Wei, Lingzhe Meng, Xue Qin, Wei Han, Xuelin Gong, Yiting Shi, Faheem Naseem, Wei Wei\*

Department of Applied Chemistry, School of Chemistry, Xi'an Key Laboratory of Sustainable Energy Material Chemistry, Xi'an Jiaotong University, Xi'an 710049, P. R. China

\*Corresponding author:

E-mail: [wwei.mc@mail.xjtu.edu.cn](mailto:wwei.mc@mail.xjtu.edu.cn)      ORCID: 0000-0002-8357-8427

## SUPPORTING FIGURES

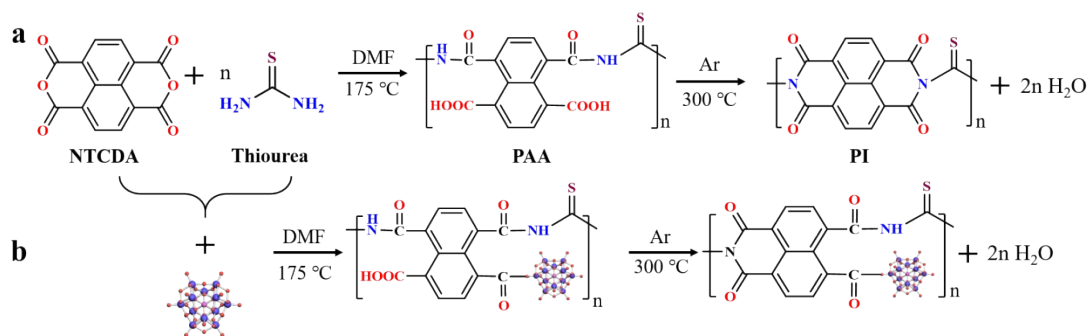

Fig. S1 Synthetic route of (a) PI and (b) PI-PMo<sub>12</sub>.

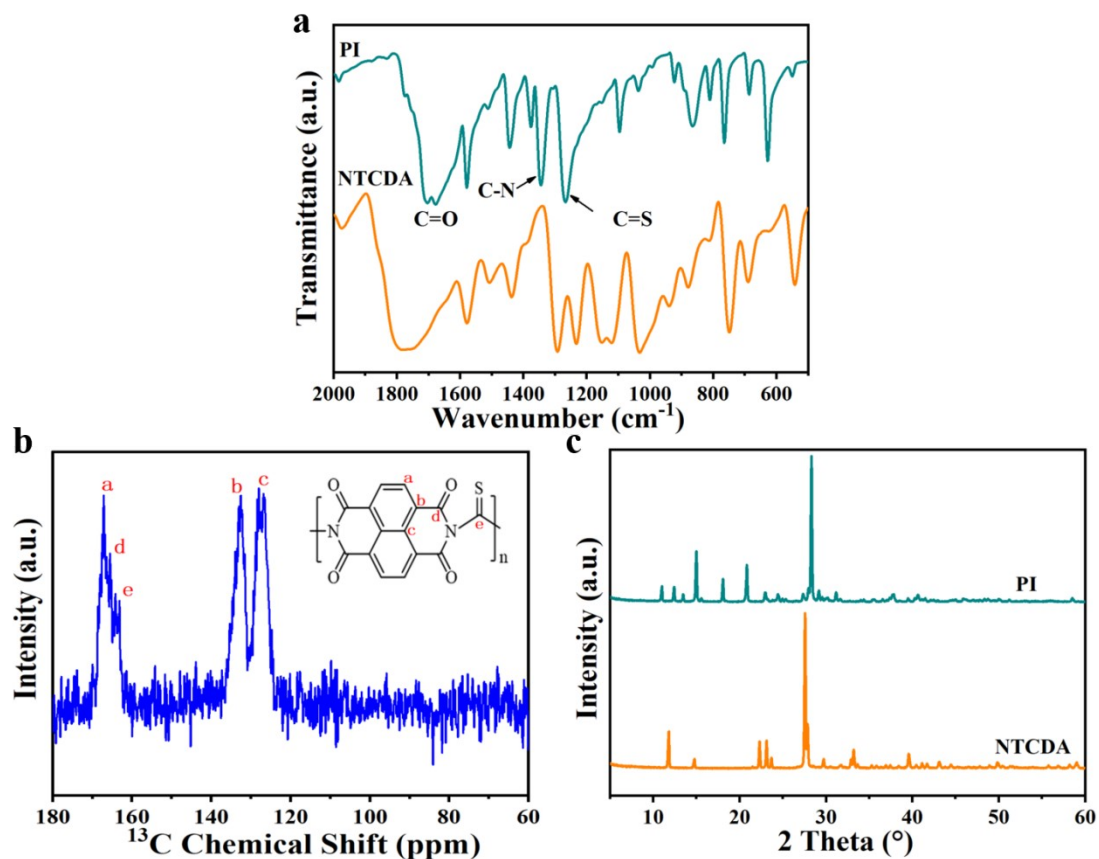

Fig. S2 (a) FTIR spectra of PI and NTCDA; (b) <sup>13</sup>C solid state NMR spectra of PI, the inset is the molecular structures of PI; (c) XRD spectra of PI and NTCDA.

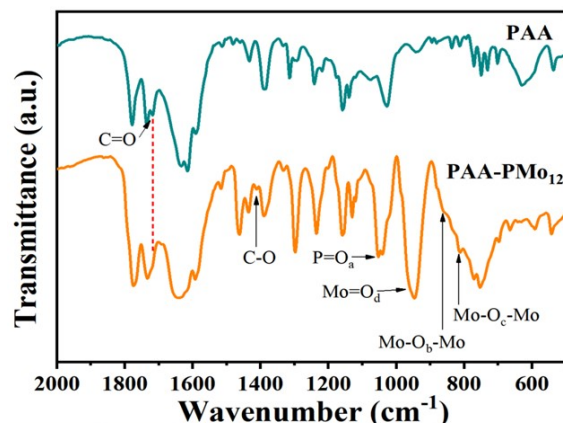

**Fig. S3** FT-IR spectra of PAA and PAA-PMo<sub>12</sub>.

FTIR spectroscopy confirms the covalent hybridization between PMo<sub>12</sub> and PAA. Compared with the pure PAA spectrum, the 1720 cm<sup>-1</sup> characteristic peak representing the C=O stretching vibration in -COOH disappears<sup>[1, 2]</sup>. Meanwhile, a new peak emerges at 1402 cm<sup>-1</sup>, which is attributed to the formation of C-O bonds. Furthermore, the distinct vibrations of the PMo<sub>12</sub> are clearly observed at 1053, 946, 860, and 811 cm<sup>-1</sup>, assigned to the P-O<sub>a</sub>, Mo=O<sub>e</sub>, Mo-O<sub>b</sub>-Mo, and Mo-O<sub>c</sub>-Mo stretching modes, respectively<sup>[3, 4]</sup>. These spectroscopic changes collectively demonstrate that a condensation reaction occurs between PMo<sub>12</sub> and the carboxyl groups of PAA and form covalent C-O-Mo linkages.

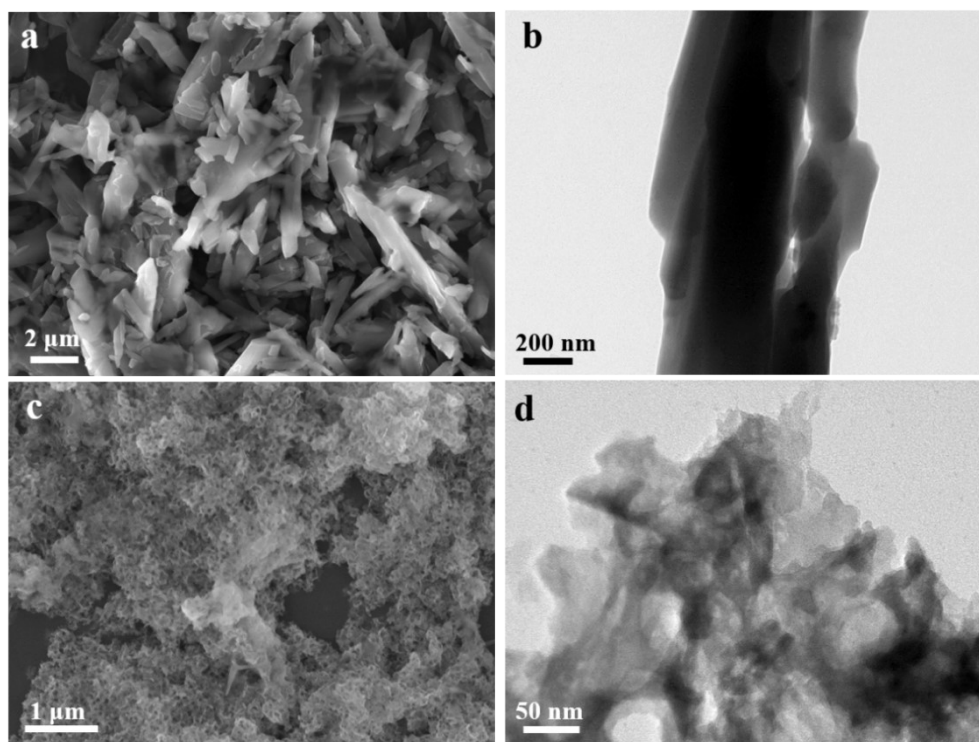

**Fig. S4** (a) SEM and (b) TEM images of PI; (c) SEM and (d) TEM images of PI-PMo<sub>12</sub>.

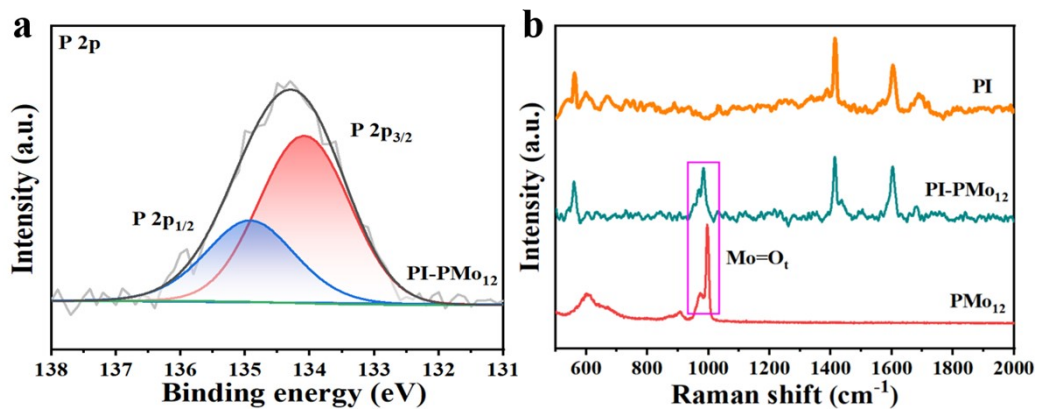

**Fig. S5** (a) P 2p XPS spectra of PI-PMo<sub>12</sub>; (b) Raman spectra of PI, PI-PMo<sub>12</sub> and PMo<sub>12</sub>.

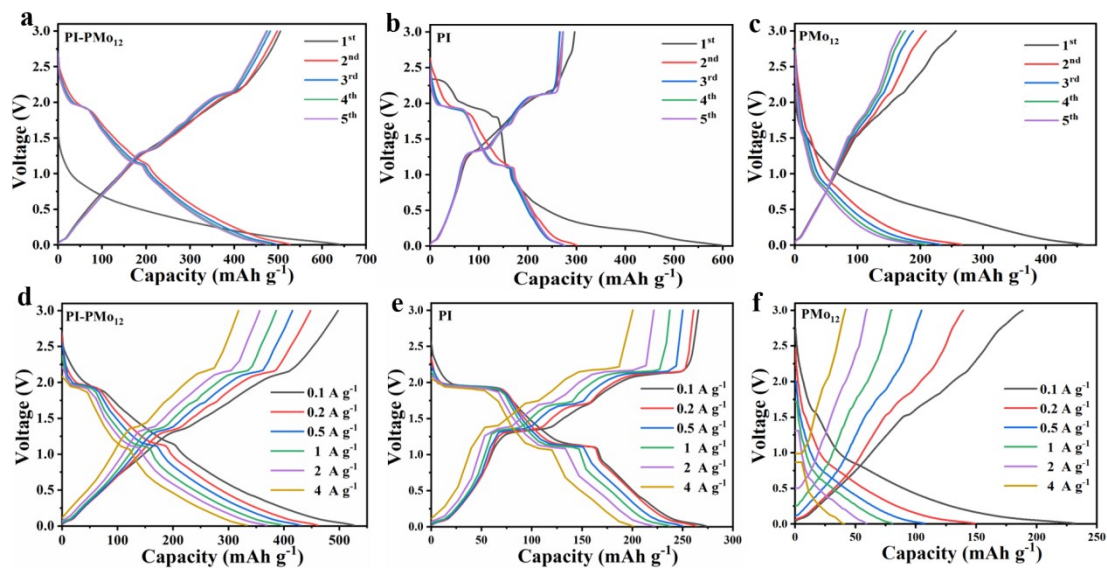

**Fig. S6** GCD profiles of (a) PI-PMo<sub>12</sub>, (b) PI and (c) PMo<sub>12</sub> anodes at 0.1 A g<sup>-1</sup>; GCD profiles at different current densities of (d) PI-PMo<sub>12</sub>, (e) PI and (f) PMo<sub>12</sub> anodes.

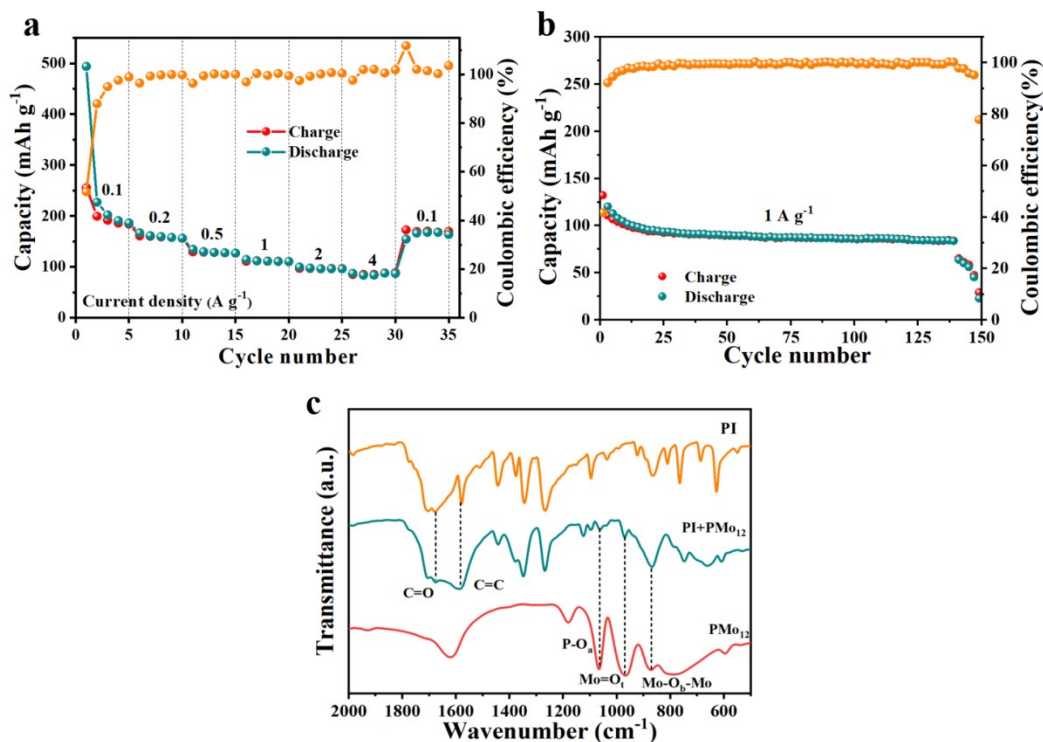

**Fig. S7** (a) Rate performance, (b) cycling stability and CEs of PI+PMo<sub>12</sub> anode; (c) FT-IR spectra of PI, PI+PMo<sub>12</sub> and PMo<sub>12</sub>.

A physically mixed control electrode (denoted as PI+PMo<sub>12</sub>) with the same component ratio as the PI-PMo<sub>12</sub> sample was prepared. As shown in Fig. S7a, the PI+PMo<sub>12</sub> electrode delivers a low reversible capacity of only 202.1 mAh g<sup>-1</sup> at a current density of 0.1 A g<sup>-1</sup> and exhibits severe capacity decay after 139 cycles at 1 A g<sup>-1</sup> (Fig. S7b). The FTIR spectrum (Fig. S7c) of the physically mixed sample shows a simple superposition of the characteristic peaks of pristine PI and PMo<sub>12</sub>, with no peak shifts or new peaks observed.

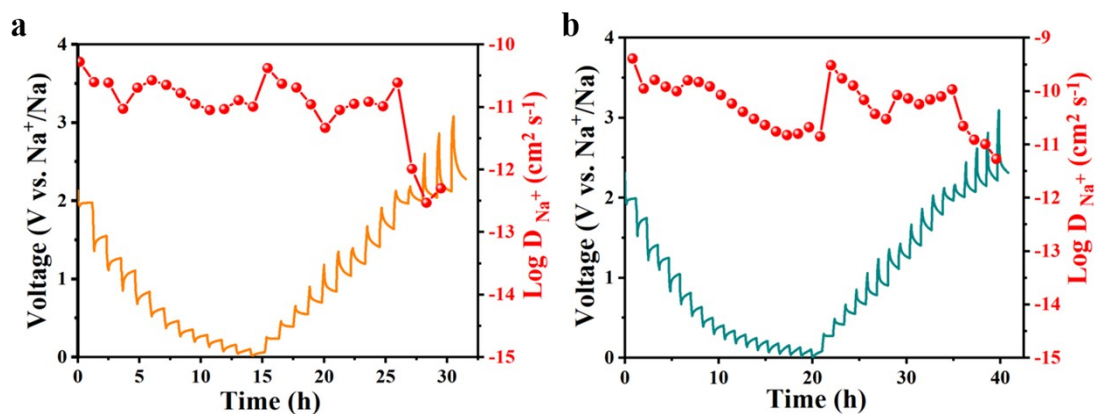

**Fig. S8** GITT profiles and calculated diffusion coefficients of (a) PI and (b) PI-PMo<sub>12</sub> anodes.

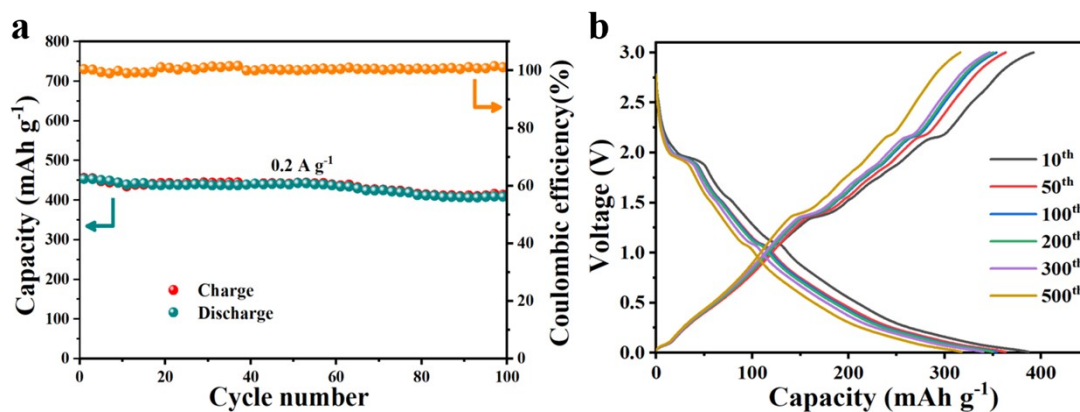

**Fig. S9** (a) Cycling stability and CEs of PI-PMo<sub>12</sub> anode at 0.2 A g<sup>-1</sup>; (b) GCD profiles of PI-PMo<sub>12</sub> at 1 A g<sup>-1</sup>.

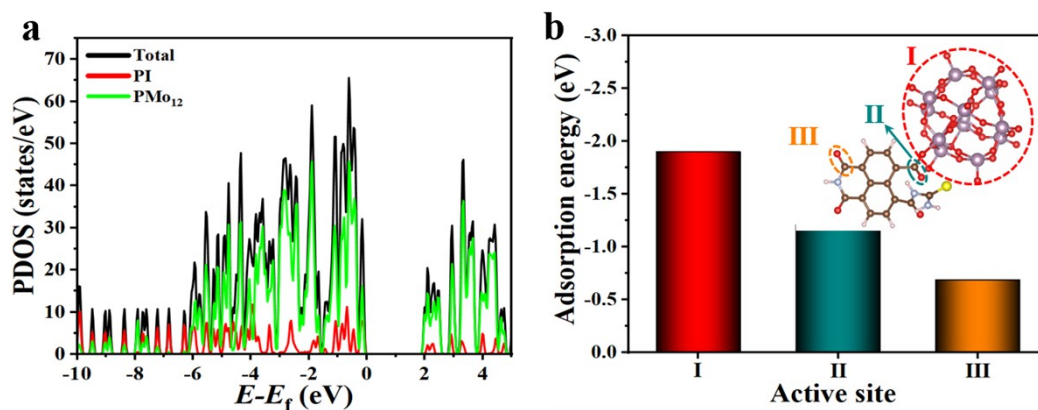

**Fig. S10** (a) PDOS analysis of PI-PMo<sub>12</sub>; (b) adsorption energies at different sites of PI-PMo<sub>12</sub> (the inset is a structural illustration of PI-PMo<sub>12</sub>).

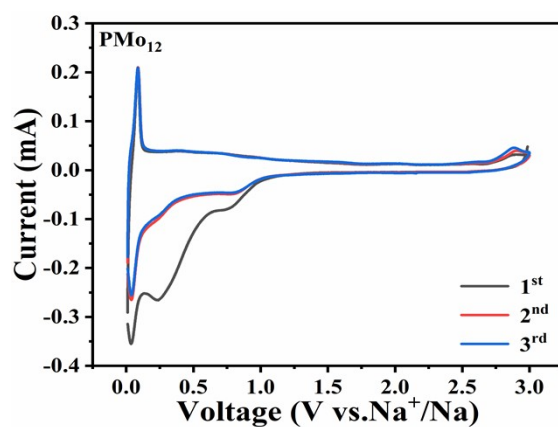

**Fig. S11** CV curves of PMo<sub>12</sub> anode within a potential window of 0.01-3.0 V, (scanning rate: 0.2 mV s<sup>-1</sup>).

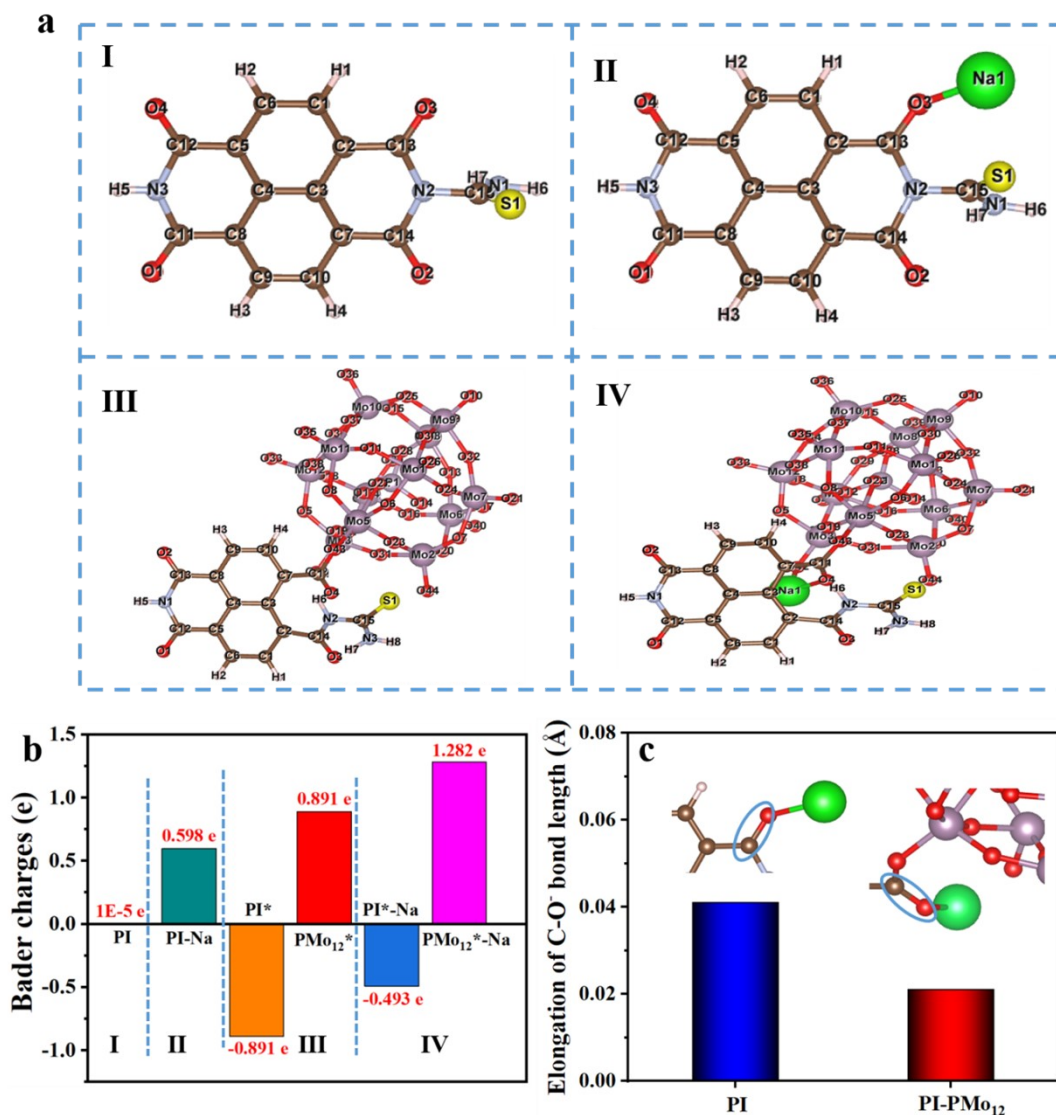

**Fig. S12** (a) Structural models of PI (I), PI after sodiation (PI-Na, II), PI-PMo<sub>12</sub> (III) and PI-PMo<sub>12</sub> after sodiation (PI-PMo<sub>12</sub>-Na, IV); (b) accumulated electron numbers of each component from Bader analysis; species with asterisks (\*) are the PI and PMo<sub>12</sub> components in the PI-PMo<sub>12</sub>; the "-Na" indicates sodiated states; (c) comparison of the C-O bond lengths elongation in PI and the PI-PMo<sub>12</sub> after sodiation.

Bader charge analysis reveals that pristine PI exhibits no net charge accumulation before sodiation. After sodiation, a charge accumulation of 0.598 e<sup>-</sup> is observed on the PI framework. For the PI-PMo<sub>12</sub>, prior to sodiation, the PI component carries a negative charge of -0.891 e<sup>-</sup>, while the PMo<sub>12</sub> component carries a positive charge of +0.891 e<sup>-</sup>, indicating intrinsic charge transfer from PI to PMo<sub>12</sub>. After sodiation, the charge on PI becomes -0.493 e<sup>-</sup> (a net increase of +0.398 e<sup>-</sup> relative to the pristine state), and the charge on PMo<sub>12</sub> increases to +1.282 e<sup>-</sup> (a net increase of +0.391 e<sup>-</sup>). These results demonstrate that after sodiation, both PI and PMo<sub>12</sub> in the

hybrids accumulate charge. Notably, the PI component in PI-PMo<sub>12</sub> accumulates only 0.398 e<sup>-</sup> upon sodiation, which is significantly less than the 0.598 e<sup>-</sup> accumulated in pristine PI, corroborating that PMo<sub>12</sub> effectively delocalizes excess electron density and mitigates charge accumulation on the PI backbone during discharge.

**Table S1.** Transferred electron numbers for PI and PI-Na derived from Bader charge analysis.

| PI   |                          | PI-Na |                          |
|------|--------------------------|-------|--------------------------|
| Atom | Electron transfer number | Atom  | Electron transfer number |
| C1   | -0.17814                 | C1    | 0.84404                  |
| C2   | 0.16353                  | C2    | -0.548                   |
| C3   | -0.03922                 | C3    | 0.14141                  |
| C4   | -0.15508                 | C4    | -0.76368                 |
| C5   | 0.11813                  | C5    | 1.15657                  |
| C6   | -0.10288                 | C6    | -0.72819                 |
| C7   | 0.04245                  | C7    | -0.28045                 |
| C8   | 0.0654                   | C8    | 0.53559                  |
| C9   | -0.13066                 | C9    | -0.96984                 |
| C10  | -0.11261                 | C10   | -2.03436                 |
| C11  | -0.98737                 | C11   | -2.10084                 |
| C12  | -1.22738                 | C12   | 0.449                    |
| C13  | -1.2943                  | C13   | -0.24295                 |
| C14  | -1.11049                 | C14   | 2.66887                  |
| C15  | -0.19637                 | C15   | -0.28439                 |
| N1   | 0.7086                   | N1    | -0.63096                 |
| N2   | 0.95781                  | N2    | -0.5885                  |
| N3   | 0.82472                  | N3    | -1.02676                 |
| H1   | 0.03047                  | H1    | 0.76125                  |
| H2   | -0.03844                 | H2    | 0.9558                   |
| H3   | 0.0004                   | H3    | 0.53379                  |
| H4   | -0.0254                  | H4    | 0.7825                   |
| H5   | -0.33738                 | H5    | 0.52185                  |
| H6   | -0.37017                 | H6    | 0.89408                  |
| H7   | -0.33924                 | H7    | 0.84658                  |
| O1   | 0.94694                  | O1    | 1.90446                  |
| O2   | 0.95524                  | O2    | -3.27248                 |
| O3   | 1.00295                  | O3    | 0.42668                  |
| O4   | 0.95904                  | O4    | 0.61913                  |
| S1   | -0.13054                 | S1    | 0.02849                  |
|      |                          | Na1   | -0.59866                 |

**Table S2.** Transferred electron numbers for PI\* and PI\*-Na derived from Bader charge analysis (species with asterisks (\*) are the PI components within the PI-PMo<sub>12</sub> composite).

| PI*  |                          | PI*-Na |                          |
|------|--------------------------|--------|--------------------------|
| Atom | Electron transfer number | Atom   | Electron transfer number |
| C1   | -0.50996                 | C1     | -0.49635                 |
| C2   | -0.03799                 | C2     | -0.00988                 |
| C3   | -0.03276                 | C3     | -0.01327                 |
| C4   | -0.01411                 | C4     | -0.00431                 |
| C5   | -0.01367                 | C5     | -0.00425                 |
| C6   | -0.52443                 | C6     | -0.50936                 |
| C7   | -0.04092                 | C7     | -0.01691                 |
| C8   | -0.0184                  | C8     | -0.01022                 |
| C9   | -0.52204                 | C9     | -0.51304                 |
| C10  | -0.51533                 | C10    | -0.51307                 |
| C11  | -0.46775                 | C11    | -0.46835                 |
| C12  | -0.38901                 | C12    | -0.36592                 |
| C13  | -0.37001                 | C13    | -0.37318                 |
| C14  | -0.39768                 | C14    | -0.3818                  |
| C15  | -0.02639                 | C15    | -0.0111                  |
| H1   | 0.47346                  | H1     | 0.47636                  |
| H2   | 0.46281                  | H2     | 0.46723                  |
| H3   | 0.4558                   | H3     | 0.45836                  |
| H4   | 0.48418                  | H4     | 0.47557                  |
| H5   | 0.37801                  | H5     | 0.38299                  |
| H6   | 0.49329                  | H6     | 0.47223                  |
| H7   | 0.37098                  | H7     | 0.37993                  |
| H8   | 0.37622                  | H8     | 0.38466                  |
| S1   | -0.41744                 | S1     | -0.34941                 |
| O1   | 0.36627                  | O1     | 0.38365                  |
| O2   | 0.35657                  | O2     | 0.37472                  |
| O3   | 0.39161                  | O3     | 0.415                    |
| O4   | 0.41587                  | O4     | 0.50034                  |
| N1   | -0.34426                 | N1     | -0.35387                 |
| N2   | -0.34722                 | N2     | -0.35                    |
| N3   | -0.92648                 | N3     | -0.91929                 |
|      |                          | Na1    | -0.78939                 |

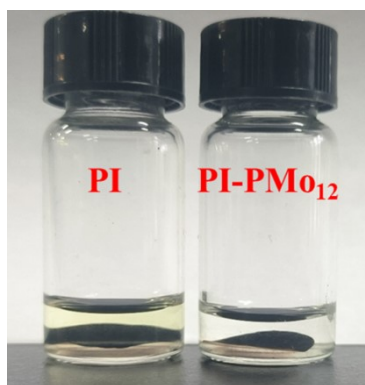

**Fig. S13** Optical images of PI and PI-PMo<sub>12</sub> electrodes soaked in the electrolyte solvent after 200 cycles.

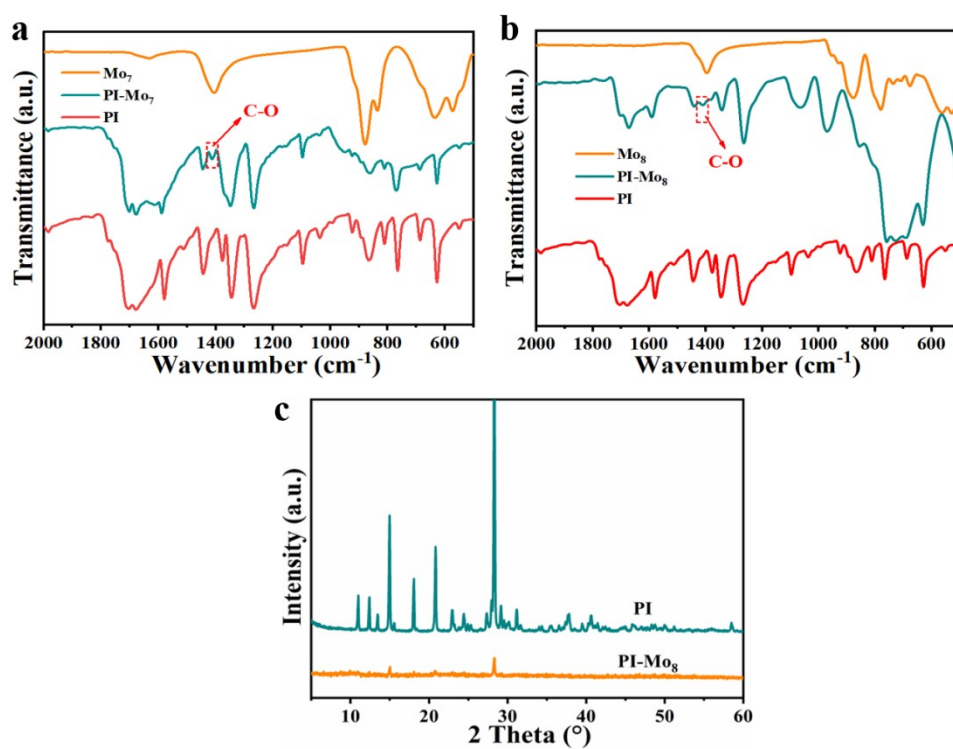

**Fig. S14** (a) FT-IR spectra of Mo<sub>7</sub>, PI and PI-Mo<sub>7</sub>; (b) FT-IR spectra of Mo<sub>8</sub>, PI and PI-Mo<sub>8</sub>; (c) XRD patterns of PI and PI-Mo<sub>8</sub>.

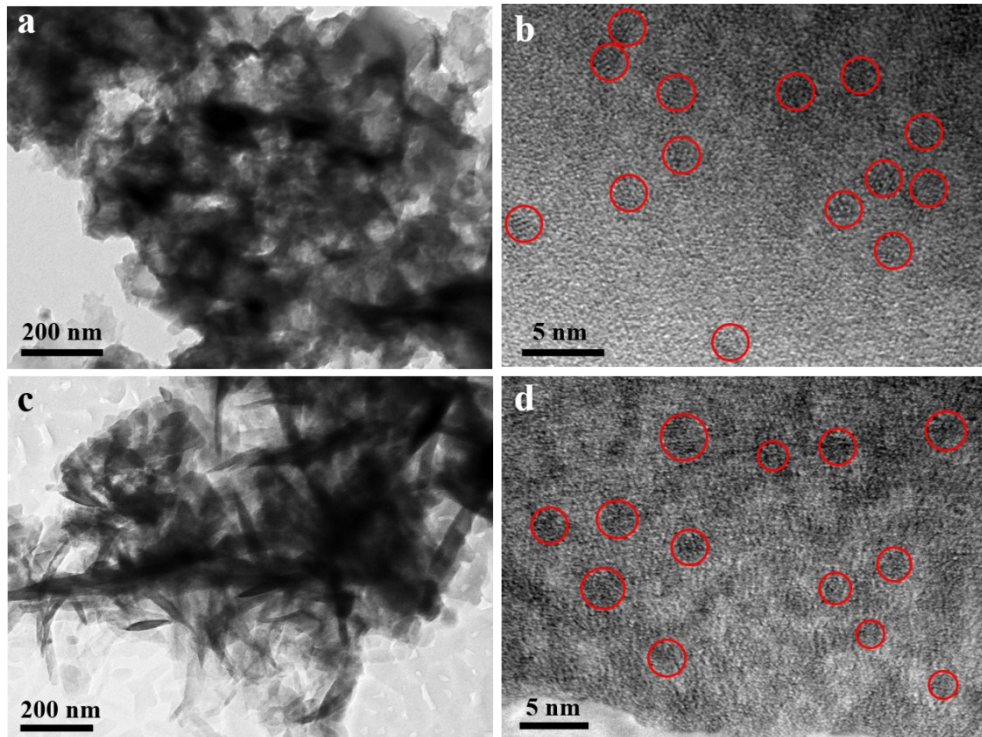

**Fig. S15** (a) TEM and (b) HRTEM images of PI-Mo<sub>7</sub>; (c) TEM and (d) HRTEM images of PI-Mo<sub>8</sub>.

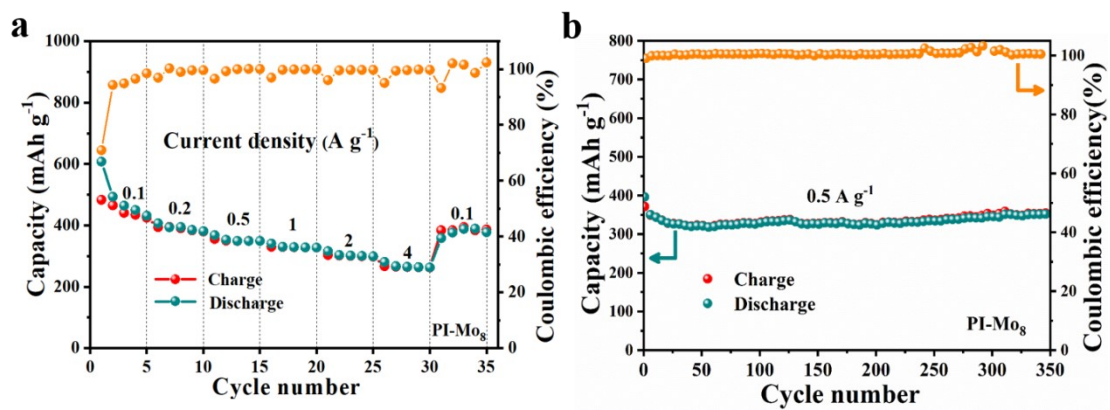

**Fig. S16** (a) Rate performance, (b) cycling stability of PI-Mo<sub>8</sub> anode at  $0.5 \text{ A g}^{-1}$ .

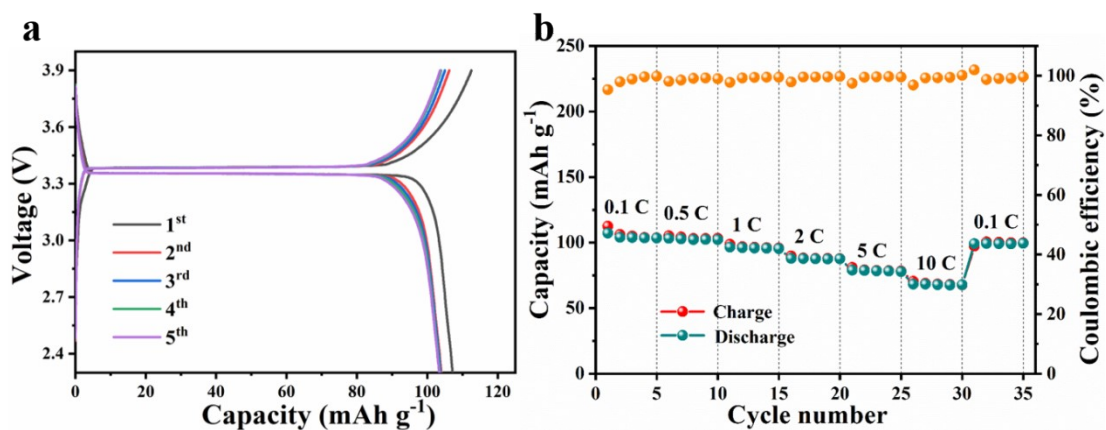

**Fig. S17** (a) GCD curves of the NVP cathode at 0.1 C within a voltage window of 2.3–3.9 V; (b) rate performance of the NVP cathode.

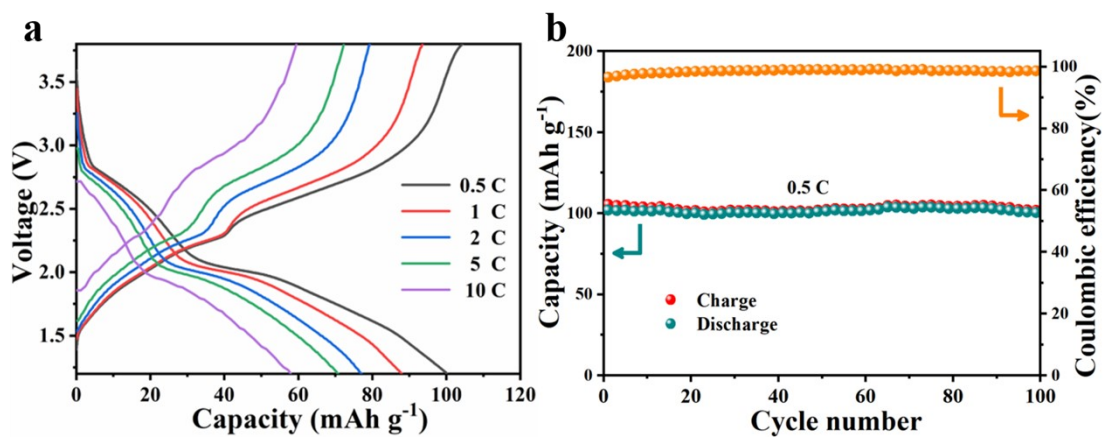

**Fig. S18** (a) GCD profiles at different current densities of NVP//PI-PMO<sub>12</sub>; (b) cycling stability and CEs of NVP//PI-PMO<sub>12</sub> at 0.5 C.

## References

- [1] R. Gautam, N. Kumar, J.G. Lynam, Theoretical and experimental study of choline chloride-carboxylic acid deep eutectic solvents and their hydrogen bonds, *J. Mol. Struct.*, 1222 (2020) 128849.
- [2] A.U. Rehman, A. Maqsood, A.B. Siddique, S. Akhtar, K.F. Fawy, Q.U. Ain, M. Sher, U. Nishan, T. Ahmad, A. Ali, A. Abbas, From waste to water treatment: Banana peel powder for polystyrene removal with FTIR-based mechanistic understanding, *J. Ind. Eng. Chem.*, 158 (2026) 597-611.
- [3] J. Hu, F. Jia, Y.-F. Song, Engineering high-performance polyoxometalate/PANI/MWNTs nanocomposite anode materials for lithium ion batteries, *Chem. Eng. J.*, 326 (2017) 273-280.
- [4] R. Abazari, L. Esrafil, A. Morsali, Y. Wu, J. Gao,  $\text{PMo}_{12}@UiO-67$  nanocomposite as a novel non-leaching catalyst with enhanced performance durability for sulfur removal from liquid fuels with exceptionally diluted oxidant, *Appl. Catal. B-Environ.*, 283 (2021) 119582.
